# Supplementary material
Source: PubMed Central journal article supplement (PMC4001371)
Supplement: supp_tpc.113.121830_tpc121830Supplemental.pdf [file supp_tpc.113.121830_tpc121830Supplemental.pdf]

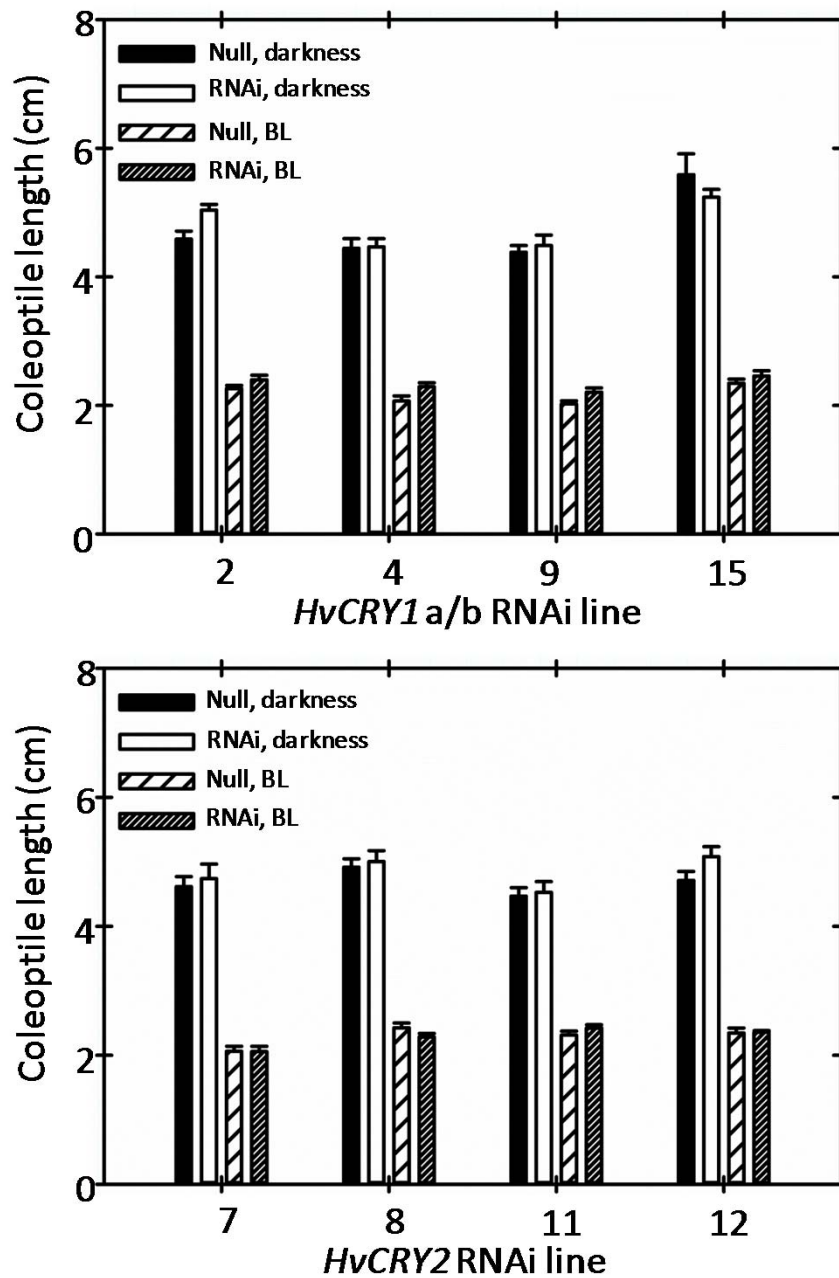

**Supplemental Figure 1. Coleoptile lengths of RNAi *CRY1a/b* and *CRY2* seedlings.** Coleoptiles of 2-week-old seedlings from *CRY1a/b* or *CRY2* RNAi or null segregant control lines grown under BL ( $23 \mu\text{mol}\cdot\text{m}^{-2}\cdot\text{sec}^{-1}$ ) or in darkness were measured. Each point is the average of nine measurements  $\pm$  S.E.

**Supplemental Table 1. Primers used for construction of Hv-*CRY1a/b* and Hv-*CRY2* RNAi hairpins.**

| Product                | Forward primer (5'-3')                   | Reverse primer (5'-3')                  |
|------------------------|------------------------------------------|-----------------------------------------|
| CRY1hairpin BamHI/SmaI | A <b>AGGATCC</b> GAGGATCAATTCAGGTGACTTGA | AA <b>CCCGGG</b> CTCTCGCAGGCCGATGGAG    |
| CRY1hairpin KpnI/SpeI  | A <b>AGGTACC</b> GAGGATCAATTCAGGTGACTTGA | AA <b>ACTAGT</b> CTCTCGCAGGCCGATGGAG    |
| CRY2hairpin BamHI/SmaI | A <b>AGGATCCA</b> AGGAACTGACGGGCTTAAATAA | AA <b>CCCGGG</b> CAGTCTTCACGATCACCCCTTG |
| CRY2hairpin KpnI/SpeI  | A <b>AGGTACCA</b> AGGAACTGACGGGCTTAAATAA | AA <b>ACTAGT</b> CAGTCTTCACGATCACCCCTTG |

*Bold letters indicate restriction sites*

**Supplemental Table 2. Sequences used in the Hv-*CRY1a/b* and Hv-*CRY2* RNAi hairpin constructs.**

---

**Sequence used for the hairpin against Hv-*CRY1a/b***

---

GAGGATCAATTCAGGTGACTTGACGAGGTGCTCATCAGACGACCTGATTTTCGAAGACGACTCG  
GAGAGGGGGAGCAACGCGCTGCTCGCACGGGCGTGGTCCGCCGGGTGGCAGAACGCCGACAA  
GGCTTTCACAGCCTTCATCAACGGCCCGCTCATCGACTACTCCGTCAACCGCAAGAAGGCCGACA  
GTGCAAACACCTCACTGCTCTCCCTTACCTGCACTTTGGCGAGCTCAGCGTCCGCAAGGTCTTCC  
ATCAAGTACGGATGAAGCAGCTAACATGGAGCAACGAGAGCAACCGTGACGGCGAGGAAGGCT

---

**Sequence used for the hairpin against Hv-*CRY2***

---

AAGGAACTGACGGGCTTAAATAAACAGACCATTTGTGTTGATGTGATCAAGGCCTCAAAGATGG  
AAGACACAGGCTCCATAGTAAATTCTCCGATATCAAGGAAAAGATCCAGCAGCGGGAGTGTGTT  
TGATGTCCCATCTTGTTTCGTCTTCAGTCGAAGTGCGCTCCAGAATCAACGTCCTGGTGGTTATTT  
TGTTGGGTCATCAAATAACATCCTGCAGAAAGCAGAGAGGAACTGTTTTGATAAGGCAGAAGAC  
GATGACAGTGCCACAGTGGTACAAACACCTCGAGAGCATCCAAGAGACCTGCCGCCTCACAAG

---

**Supplemental Table 3. Primer sequences used for qRT-PCR.**

| <b>Gene</b>          | <b>Forward primer (5'-3')</b> | <b>Reverse primer (5'-3')</b> | <b>Accession</b> |
|----------------------|-------------------------------|-------------------------------|------------------|
| Hv- <i>ACT</i>       | GCCGTGCTTCCCTCTATG            | GCTTCTCCTTGATGCCCTTA          | AY145451         |
| Hv- <i>ABA8'OH-1</i> | AGCACGGACCGTCAAAGTC           | TGAGAATGCCTACGTAGTG           | AK333121         |
| Hv- <i>CIP8</i>      | CGAGGGTTTCGTGTACACCTC         | ACACACGGAGCACTCCTCTC          | Barley1_18584    |
| Hv- <i>CRY1a/b</i>   | TCAGCCAGAGCCTCAAGCAC          | GTCGTAGAGGTGGTTGAAGAAG        | DQ201150         |
| Hv- <i>CRY2</i>      | AAGAGACCTGCCGCCTCACAA         | CGAAACCGTTTCGTCCAGGTGT        | DQ201156         |
| Hv- <i>ELIP58</i>    | TTCTCCGTAGCGTCGCTGCTG         | AAAACCCACAGCGCTGCAATC         | X15693           |
| Hv- <i>ELIP90</i>    | ATGAACGCCAACGCGGAActCT        | AGTACATGTTGTGTTATCCTGTC       | X15692           |
| Hv- <i>HY5</i>       | AAGAAGAATTCGGAGCTGGAAG        | TCTGTGCTATTGACCCTCACTT        | Barley1_15369    |
| Hv- <i>NCED1</i>     | CCAGCACTAATCGATTCC            | GAGAGTGGTGATGAGTAA            | CD884104         |
| Hv- <i>NCED2</i>     | CATGGAAAGAGGAAGTTGC           | GAAGCAAGTGTGAGCTAAC           | CA731387         |
